# Supplementary material
Source: MDPI journal article supplement (https://www.mdpi.com/2227-9040/11/7/398)
Supplement: s1 [file s1]

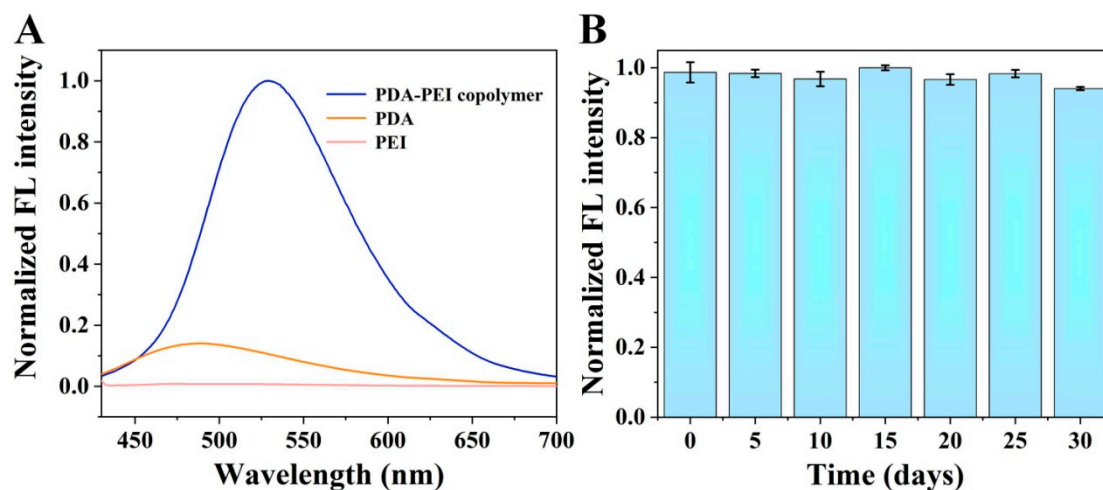

**Figure S1.** (A) Fluorescence spectra of 0.2 mg/mL PDA-PEI copolymer, PDA and PEI. (B) The stability of PDA-PEI copolymer.

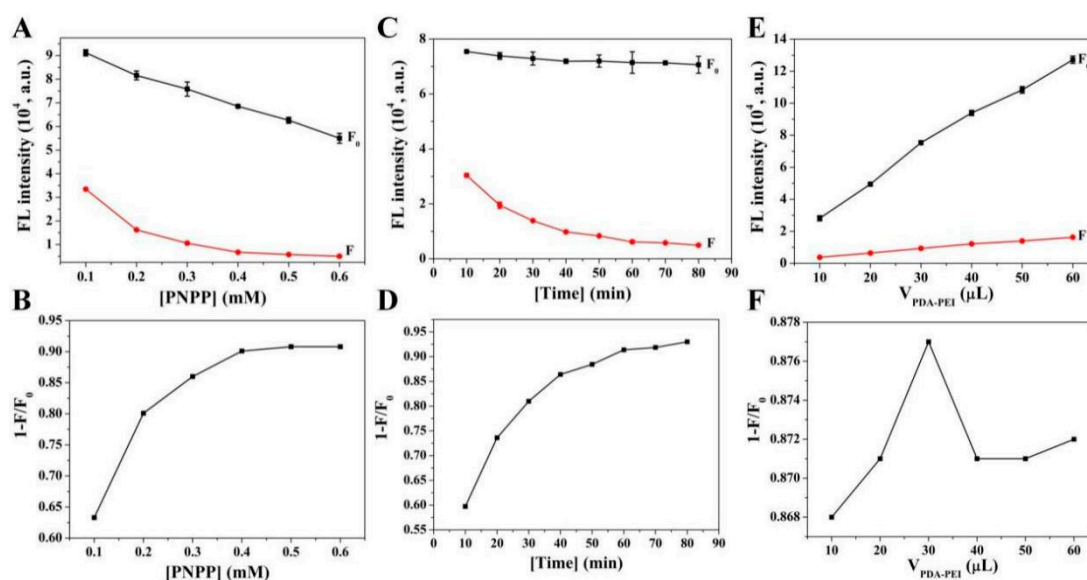

**Figure S2.** The impacts of PNPP concentration (A), incubation time of PNPP with ALP (C), the volume of PDA-PEI copolymer (E) on the fluorescence intensity of PDA-PEI QDs copolymer in the absence ( $F_0$  value) and presence of ALP ( $F$  value). The relationship between PNPP concentration (B), incubation time of PNPP with ALP (D), the volume of PDA-PEI copolymer (F) and  $1-F_0/F$ .

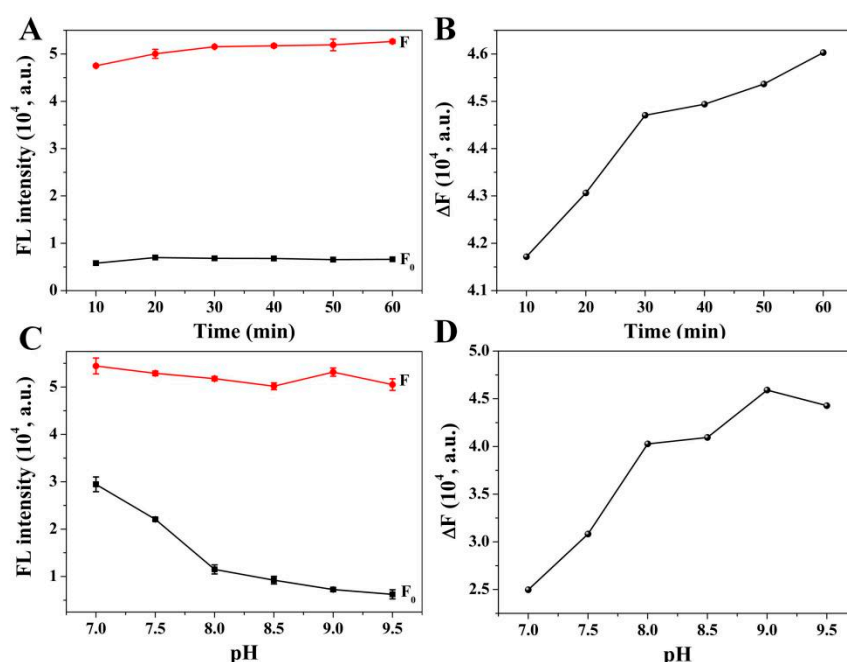

**Figure S3.** The effects of incubation time of glyphosate with ALP (A) and the pH value of buffer solution (B) on glyphosate detection. The change trend of  $\Delta F$  at different incubation time (C) and different pH values of buffer solution (D).

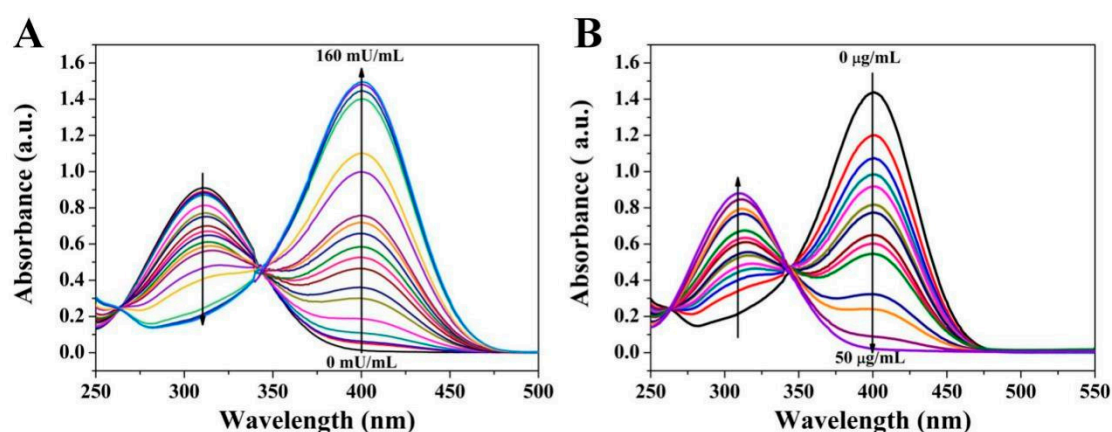

**Figure S4.** UV-vis absorption spectra of PNPP in the absence and presence of various activities of ALP (A) and PNPP-ALP before and after the introduction of various concentrations of glyphosate (B).

**Table S1.** Comparison the analytical performances of different methods for ALP detection.

| Methods/Materials                                                | Linear range (mU/mL) | Detection limit (mU/mL) | Reference |
|------------------------------------------------------------------|----------------------|-------------------------|-----------|
| Colorimetry/Gold nanorods                                        | 1.0–8.0              | 0.34                    | 31        |
| Colorimetry/LMIO <sup>a</sup> /TMB/H <sub>2</sub> O <sub>2</sub> | 0.24–8               | 0.24                    | 32        |
| Colorimetry/FeCo NPs@PNC <sup>b</sup>                            | 0.6–10               | 0.49                    | 33        |
| Colorimetry/CeVO <sub>4</sub>                                    | 1–210                | 0.618                   | 34        |
| Fluorimetry/Azamonardine                                         | 0.1–6                | 0.07                    | 35        |
| Fluorimetry/MnO <sub>2</sub> nanosheets                          | 0.25–10              | 0.06                    | 36        |
| Fluorimetry/Carbon dots                                          | 0–30                 | 0.314                   | 37        |
| Fluorimetry/Au/Ag nanoclusters                                   | 0.5–10               | 0.193                   | 38        |
| Fluorimetry/PDA-PEI copolymer                                    | 0.2–9                | 0.16                    | This work |

<sup>a</sup>La<sub>0.9</sub>Mn<sub>0.9</sub>Ir<sub>0.1</sub>O<sub>3-δ</sub>; <sup>b</sup>porous nanocages
